# Supplementary material for: Genetic variation for body weight change in mice in response to physical exercise
Source: PubMed Central journal article supplement (PMC2760581; doi:10.1186/1471-2156-10-58), 2009-09-21
Supplement: 1471-2156-10-58-S4.pdf [file 1471-2156-10-58-S4.pdf]

**Table 4****Epistatic QTLs with overall significant effects on WTC and the physical activity traits**

| CH1 | cM  | CH2 | cM | <i>F</i> | Prob. <i>F</i>   | WTC       |           |           |           | Activity  |           |           |           |  |
|-----|-----|-----|----|----------|------------------|-----------|-----------|-----------|-----------|-----------|-----------|-----------|-----------|--|
|     |     |     |    |          |                  | <i>aa</i> | <i>ad</i> | <i>da</i> | <i>dd</i> | <i>aa</i> | <i>ad</i> | <i>da</i> | <i>dd</i> |  |
|     |     |     |    |          |                  |           |           |           |           |           | Distance  |           |           |  |
| 5   | 35  | 19  | 55 | 5.35     | <b>0.0000017</b> | 0.05      | -0.71**   | -0.27     | -0.02     | -0.17     | 0.29      | -0.34     | -0.81**   |  |
| 16  | 33  | 17  | 65 | 3.51     | 0.0005699        | 0.15      | -0.29     | 0.58**    | 0.22      | 0.40**    | -0.03     | -0.35     | 0.11      |  |
|     |     |     |    |          |                  |           |           |           |           |           | Duration  |           |           |  |
| 3   | 68  | 6   | 91 | 3.40     | 0.0007965        | -0.37*    | -0.03     | -0.25     | -0.81*    | -0.25     | 0.80**    | -0.16     | -0.31     |  |
| 5   | 35  | 19  | 55 | 5.31     | <b>0.0000020</b> | 0.05      | -0.71**   | -0.27     | -0.02     | -0.20     | 0.20      | -0.40*    | 0.77      |  |
| 7   | 42  | 11  | 50 | 3.35     | 0.0009265        | -0.22     | 0.19      | -0.54**   | -0.31     | -0.19     | 0.41*     | -0.36     | -0.40     |  |
| 9   | 48  | 10  | 78 | 3.42     | 0.0007526        | 0.01      | -0.52**   | 0.43**    | -0.00     | 0.28*     | 0.34      | -0.24     | 0.17      |  |
|     |     |     |    |          |                  |           |           |           |           |           | Speed     |           |           |  |
| 2   | 75  | 7   | 38 | 3.70     | 0.0003174        | 0.15      | -0.19     | -0.43*    | 0.53*     | -0.23*    | 0.18      | 0.30      | -0.77**   |  |
| 3   | 62  | 7   | 68 | 3.75     | 0.0002727        | 0.22      | 0.06      | -0.72**   | 0.19      | -0.45**   | -0.01     | 0.39      | -0.32     |  |
| 4   | 105 | 13  | 67 | 3.79     | <b>0.0002409</b> | 0.64**    | 0.20      | 0.17      | -0.32     | 0.19      | -1.08**   | -0.07     | -0.20     |  |
| 5   | 11  | 14  | 64 | 3.42     | 0.0007540        | -0.11     | 0.07      | 0.75**    | 0.04      | -0.15     | -0.20     | -0.58**   | -0.43     |  |
| 9   | 86  | 11  | 88 | 3.42     | 0.0007489        | -0.20     | -0.50*    | 0.13      | 0.38      | -0.06     | -0.59**   | -0.08     | -0.50     |  |

Shown are locations in cM from the centromere for QTLs on each pair of chromosomes (CH1 and CH2) whose *F* tests for overall epistasis for weight change (WTC) with each of the physical activity traits resulted in a probability less than 0.001 (probabilities in bold reach the 0.05 suggestive Bonferroni threshold level). For each pairwise QTL combination, standardized individual epistatic components also are given. \* =  $P < 0.05$ ; \*\* =  $P < 0.01$ .
