# Supplementary material for: Genetic variation for body weight change in mice in response to physical exercise
Source: PubMed Central journal article supplement (PMC2760581; doi:10.1186/1471-2156-10-58), 2009-09-21
Supplement: 1471-2156-10-58-S5.pdf [file 1471-2156-10-58-S5.pdf]

**Table 5****Phenotypic, genetic and environmental correlations of WTC with the physical activity traits**

| Traits       | Phenotypic | Epistatic |        | Environmental |        |
|--------------|------------|-----------|--------|---------------|--------|
|              | $r_p$      | $r_I$     | %      | $r_E$         | %      |
| WTC-Distance | -0.12*     | -0.50     | (34.1) | -0.09         | (65.9) |
| WTC-Duration | -0.07      | -0.09     | (17.4) | -0.07         | (82.6) |
| WTC-Speed    | -0.18**    | -0.56**   | (51.1) | -0.11         | (48.9) |
| Means        | -0.12      | -0.39     | (34.2) | -0.08         | (65.8) |

Shown are phenotypic ( $r_p$ ), epistatic or interaction genetic ( $r_I$ ), and environmental correlations ( $r_E$ ) of WTC with each of the physical activity traits in the F<sub>2</sub> mice. The percentage of the phenotypic covariance between traits explained by each of these sources of covariation also is given in parentheses. \* = P < 0.05; \*\* = P < 0.01
