# Supplementary material for: Genetic variation for body weight change in mice in response to physical exercise
Source: BMC Genet. 2009 Sep 21;10:58. doi: 10.1186/1471-2156-10-58 (PMC2760581; doi:10.1186/1471-2156-10-58)
Supplement: Additional file 1 — Basic statistics for weight change and the physical activity traits. [file 1471-2156-10-58-S1.pdf]

**Table 1****Basic statistics for weight change and the physical activity traits**

|                   | Mean   | Std Dev | Components |       | Correlations |          |        |
|-------------------|--------|---------|------------|-------|--------------|----------|--------|
|                   |        |         | I          | II    | Distance     | Duration | Speed  |
| Weight Change (g) | 1.84   | 1.35    | -0.12      | 0.98  | -0.09        | -0.05    | -0.15* |
| Distance (km/day) | 6.36   | 2.39    | 0.63       | 0.10  |              | 0.92**   | 0.71** |
| Duration min/day) | 330.41 | 101.00  | 0.57       | 0.16  |              |          | 0.45** |
| Speed meters/min) | 18.70  | 3.42    | 0.51       | -0.08 |              |          |        |

Shown are means and standard deviations for body weight change, distance, duration, and speed in the 307 F<sub>2</sub> mice. Also shown are loadings on the first two components (I and II) derived from a principal components analysis, and pairwise correlations among these four traits. \* =  $P < 0.05$ ; \*\* =  $P < 0.01$
