# Supplementary material for: Genetic variation for body weight change in mice in response to physical exercise
Source: BMC Genet. 2009 Sep 21;10:58. doi: 10.1186/1471-2156-10-58 (PMC2760581; doi:10.1186/1471-2156-10-58)
Supplement: Additional file 3 — Epistatic QTLs affecting WTC. [file 1471-2156-10-58-S3.pdf]

**Table 3****Epistatic QTLs affecting WTC**

| CH1 | cM  | CH2 | cM | <i>F</i> | Prob. <i>F</i>  | <i>aa</i> | <i>ad</i> | <i>da</i> | <i>dd</i> |
|-----|-----|-----|----|----------|-----------------|-----------|-----------|-----------|-----------|
| 2   | 83  | 14  | 48 | 5.57     | <b>0.000252</b> | -0.24     | 0.79**    | 0.35      | 0.06      |
| 2   | 100 | 15  | 14 | 4.79     | 0.000946        | -0.11     | -0.83**   | -0.41     | 0.44      |
| 3   | 47  | 17  | 64 | 4.95     | 0.000718        | -0.15     | 0.61**    | -0.50**   | 0.08      |
| 4   | 47  | 7   | 50 | 5.08     | 0.000579        | 0.32*     | 0.47**    | 0.46*     | 0.22      |
| 4   | 98  | 13  | 43 | 4.86     | 0.000838        | 0.37*     | 0.22      | 0.67**    | 0.24      |
| 5   | 28  | 19  | 53 | 5.59     | <b>0.000243</b> | 0.00      | -0.89**   | -0.23     | 0.19      |
| 6   | 21  | X   | 29 | 5.65     | <b>0.000221</b> | -0.47**   | -0.63*    | 0.15      | 0.39      |
| 7   | 80  | 18  | 10 | 6.22     | <b>0.000083</b> | 0.08      | -0.79**   | -0.22     | 0.62*     |
| 14  | 6   | 16  | 22 | 6.64     | <b>0.000041</b> | 0.49**    | 0.67**    | -0.18     | -0.15     |
| 16  | 18  | 18  | 4  | 7.06     | <b>0.000020</b> | 0.14      | 0.62**    | 0.57**    | -0.32     |

Shown are locations in cM from the centromere for QTLs on each pair of chromosomes (CH1 and CH2) whose *F* tests for overall epistasis affecting weight change resulted in a probability less than 0.001 (probabilities in bold reach the 0.05 suggestive Bonferroni threshold level) . For each pairwise QTL combination, the individual standardized epistatic components also are given. \* =  $P < 0.05$ ; \*\* =  $P < 0.01$
